# Supplementary material
Source: PubMed Central journal article supplement (PMC5620417)
Supplement: blood783233-suppl1.pdf [file blood783233-suppl1.pdf]

## Supplemental Methods

The Patient Discharge Database (PDD) includes all patients admitted to non-Federal hospitals in California from 1991-2014 (there are 14 Federal facilities in California). Each admission includes demographic information, such as age, race/ethnicity, and gender. Clinical variables, coded using the International Classification of Diseases, 9<sup>th</sup> Revision, Clinical Modifications (ICD-9-CM), include a principal diagnosis and up to 24 other diagnoses and a principal procedure and up to 20 other procedures, including the corresponding procedure dates. The Emergency Department Utilization (EDU) database captures similar information to the PDD for all non-Federal California emergency department visits since 2005.

As described previously,<sup>1,2</sup> SCD cases had to have: 1) at least 2 separate admissions with an SCD code in the principal (first position) diagnosis, or 2) at least one admission with an SCD code in the principal position and a SCD code in a secondary position in at least 2 additional admissions. Specific SCD ICD-9-CM codes (282.41, 282.42, 282.60, 282.61, 282.62, 282.63, 282.64, 282.68, 282.69) were used. All patients had to be <65 years of age at first PDD or EDU encounter to be considered SCD cases. The algorithm emphasized specificity over sensitivity and was used in a previously published study.<sup>1,2</sup>

Person-years of follow-up were calculated for each SCD patient beginning at the estimated date of birth or January 1, 1988 (whichever occurred later). Follow-up was calculated to date of cancer diagnosis, date of death, or end of study -12/31/2014 (whichever occurred first). Person-years of follow-up and the numbers of cancers occurring among SCD patients (observed cancers) were calculated by 5-year age groups, 3-year time-periods, gender and race/ethnicity in order to allow for comparisons to the underlying California population. Expected numbers of first primary cancers were calculated by gender, race/ethnicity, 5-year age-categories, and 3-year time-periods using first primary cancers rates from the California Cancer Registry (CCR). California cancer rates were calculated using Surveillance, Epidemiology, and End Results (SEER) Stat version 8.3.2. Expected number of cancers were generated

assuming the number of observed cancers follows a Poisson distribution.<sup>3</sup> All other analyses were done using SAS® Version 9.4; macro %stratify<sup>4,5</sup> was used to calculate person years of follow-up among the SCD patients.

### Supplemental References

1. Brunson A, Lei A, Rosenberg AS, White RH, Keegan T, Wun T. Increased incidence of VTE in sickle cell disease patients: risk factors, recurrence and impact on mortality. *Br J Haematol*. 2017.
2. Adesina O, Brunson A, Keegan T, Wun T. Osteonecrosis of the Femoral Head in Sickle Cell Disease: Prevalence, Comorbidities and Surgical Outcomes in California. *Blood Advances*. 2017;In Press.
3. Breslow NE, Day NE. Statistical methods in cancer research. Volume II--The design and analysis of cohort studies. *IARC Sci Publ*. 1987(82):1-406.
4. Rostgaard K. Methods for stratification of person-time and events - a prerequisite for Poisson regression and SIR estimation. *Epidemiol Perspect Innov*. 2008;5:7.
5. Macaluso M. Exact stratification of person-years. *Epidemiology*. 1992;3(5):441-448.
6. Charache S, Terrin ML, Moore RD, et al. Effect of hydroxyurea on the frequency of painful crises in sickle cell anemia. Investigators of the Multicenter Study of Hydroxyurea in Sickle Cell Anemia. *N Engl J Med*. 1995;332(20):1317-1322.

**Table S1: Baseline Characteristics of California Sickle Cell Disease (SCD) Cohort, 1991-2014**

| Variables                       | All   |        | Cancer |        | No Cancer |        |
|---------------------------------|-------|--------|--------|--------|-----------|--------|
|                                 | N     | %      | N      | %      | N         | %      |
| <b>Total</b>                    | 6,423 | 100.0% | 115    | 100.0% | 6,308     | 100.0% |
| <b>Gender</b>                   |       |        |        |        |           |        |
| Male                            | 3,041 | 47.3%  | 50     | 43.5%  | 2,991     | 47.4%  |
| Female                          | 3,382 | 52.7%  | 65     | 56.5%  | 3,317     | 52.6%  |
| <b>Race/Ethnicity</b>           |       |        |        |        |           |        |
| Non-Hispanic White              | 185   | 2.9%   | 7      | 6.1%   | 178       | 2.8%   |
| African-American                | 5767  | 89.8%  | 99     | 86.1%  | 5668      | 89.9%  |
| Hispanic                        | 266   | 4.1%   | 6      | 5.2%   | 260       | 4.1%   |
| Asian/Pacific Islander          | 35    | 0.5%   | .      | .      | 35        | 0.6%   |
| Other/Unknown                   | 170   | 2.6%   | 3      | 2.6%   | 167       | 2.6%   |
| <b>SCD Severity†</b>            |       |        |        |        |           |        |
| Less Severe                     | 3639  | 56.7%  | 61     | 53.0%  | 3578      | 56.7%  |
| Severe                          | 2,784 | 43.3%  | 54     | 47.0%  | 2,730     | 43.3%  |
| <b>Cancer-Age at Diagnosis</b>  |       |        |        |        |           |        |
| Pediatric - age <15             | 6     | 0.1%   | 6      | 5.2%   |           |        |
| AYA- age 15-39                  | 34    | 0.5%   | 34     | 29.6%  |           |        |
| Adult - age > 39                | 75    | 1.2%   | 75     | 65.2%  |           |        |
| <b>Cancer-Year of Diagnosis</b> |       |        |        |        |           |        |
| 1988-1994                       | 6     | 0.1%   | 6      | 5.2%   |           |        |
| 1995-2001                       | 25    | 0.4%   | 25     | 21.7%  |           |        |
| 2002-2008                       | 36    | 0.6%   | 36     | 31.3%  |           |        |
| 2009-2014                       | 48    | 0.7%   | 48     | 41.7%  |           |        |
| <b>Cancer Site‡</b>             |       |        |        |        |           |        |
| Breast                          | 16    | 0.2%   | 16     | 13.9%  |           |        |
| Digestive System                | 16    | 0.2%   | 16     | 13.9%  |           |        |
| Respiratory System              | 16    | 0.2%   | 16     | 13.9%  |           |        |
| Lymphoma                        | 15    | 0.2%   | 15     | 13.0%  |           |        |
| Leukemia                        | 12    | 0.2%   | 12     | 10.4%  |           |        |
| Miscellaneous                   | 8     | 0.1%   | 8      | 7.0%   |           |        |
| Urinary System                  | 8     | 0.1%   | 8      | 7.0%   |           |        |
| Male Genitals                   | 6     | 0.1%   | 6      | 5.2%   |           |        |
| Female Genitals                 | 5     | 0.1%   | 5      | 4.3%   |           |        |
| Brain and other CNS             | 4     | 0.1%   | 4      | 3.5%   |           |        |
| Myeloma                         | 4     | 0.1%   | 4      | 3.5%   |           |        |
| Bone and Joint                  | 1     | 0.0%   | 1      | 0.9%   |           |        |
| Endocrine System                | 1     | 0.0%   | 1      | 0.9%   |           |        |
| Kaposi Sarcoma                  | 1     | 0.0%   | 1      | 0.9%   |           |        |
| Oral Cavity System              | 1     | 0.0%   | 1      | 0.9%   |           |        |

|             |   |      |   |      |
|-------------|---|------|---|------|
| Soft Tissue | 1 | 0.0% | 1 | 0.9% |
|-------------|---|------|---|------|

NH refers to Non-Hispanic;

AYA refers to adolescent and young adult, age 15-39 years, and

CNS refers to central nervous system.

†Patients with an averaging  $\geq 3$  visits per year were defined as severe SCD; patients averaging  $< 3$  visits per year were defined as less severe SCD.<sup>6</sup>

‡Cancer sites defined using SEER Site Recode ICD-O-3/WHO 2008 Definition.
